# Supplementary material for: Choline supplementation in early life improves and low levels of choline can impair outcomes in a mouse model of Alzheimer’s disease
Source: eLife. 2024 Jun 21;12:RP89889. doi: 10.7554/eLife.89889 (PMC11192536; doi:10.7554/eLife.89889)
Supplement: Supplementary file 1. — The major constituents of the diets are shown. Concentrations are g nutrient/kg chow. Food was provided ad libitum to breeders during mating, gestation and until weaning. After weaning all mice were fed the intermediate diet. WT mice were fed the intermediate diet during breeding, gestation, until weaning and after weaning. [file elife-89889-supp1.xls]

## Sheet: Sheet1
	Low choline	Intermediate	High
Nutrient	concentration (g/kg chow)
Choline (chloride)	5	2	1.1
Carbohydrate	690	570	690
Fat	120	170	120
Protein	177	236	177
Folic Acid	0.2	0.003	0.2
Riboflavin	0.6	0.005	0.6
Pyridoxine	0.7	0.006	0.7
Niacin	3	0.78	3
Thiamine	0.6	0.015	0.6
Biotin	0.02	0.002	0.02
Fiber	50	33	50
Ash	<40	61	<40
Vitamin D3 (IU/gm)		3.4
Vitamin D3 (400,000 IU/g)	0.25		0.25
Vitamin E (500 IU/g)	10		10
Vitamin E (IU/kg)		62
